# Supplementary material for: One-pot synthesis of long-range aligned nanochannels for Li-ion transfer pathways
Source: Royal Society of Chemistry journal article supplement (doi:10.1039/d4nr05111d), 2025-01-01
Supplement: d4nr05111d1.pdf [file d4nr05111d1.pdf]

## Supporting Information

# One-pot synthesis of long-range aligned nanochannels for Li-ion transfer pathways

*Zehan Chen<sup>a</sup>, Isaac Alvarez Moises<sup>a</sup>, Ruth Bruker<sup>b</sup>, He Jia<sup>a</sup>, Shanshan Yan<sup>a</sup>, Yinghui Zhang<sup>a</sup>, Zhenni He<sup>a</sup>, Kejie Zhou<sup>c</sup>, Sorin Melinte<sup>c</sup>, Laurent Rubatat<sup>d</sup>, Klaus Meerholz<sup>b</sup>, Jean-François Gohy<sup>a,\*</sup>*

<sup>a</sup> Institute of Condensed Matter and Nanosciences (IMCN), Bio- and Soft Matter (BSMA), Université catholique de Louvain, Place L. Pasteur, 1, 1348, Louvain-la-Neuve, Belgium

<sup>b</sup> Institut für Physikalische Chemie, Department für Chemie, Universität zu Köln, Greinstraße 4-6, D-50939, Köln, Germany

<sup>c</sup> Institute of Information and Communication Technologies, Electronics and Applied Mathematics (ICTEAM), Electrical Engineering (ELEN), Université catholique de Louvain, 1348, Louvain-la-Neuve, Belgium

<sup>d</sup> Université de Pau et des Pays de l'Adour, E2S UPPA, CNRS, IPREM, Pau 64053, France

\*Email: jean-francois.gohy@uclouvain.be (Jean-François Gohy)

## Contents

|                              |    |
|------------------------------|----|
| 1 Figures .....              | 3  |
| Figure S1 .....              | 3  |
| Figure S2 .....              | 4  |
| Figure S3 .....              | 5  |
| Figure S4 .....              | 6  |
| Figure S5 .....              | 8  |
| Figure S6 .....              | 10 |
| 2 Tables.....                | 11 |
| Tables S1 .....              | 11 |
| Tables S2 .....              | 12 |
| 3 Supporting References..... | 13 |

## 1 Figures

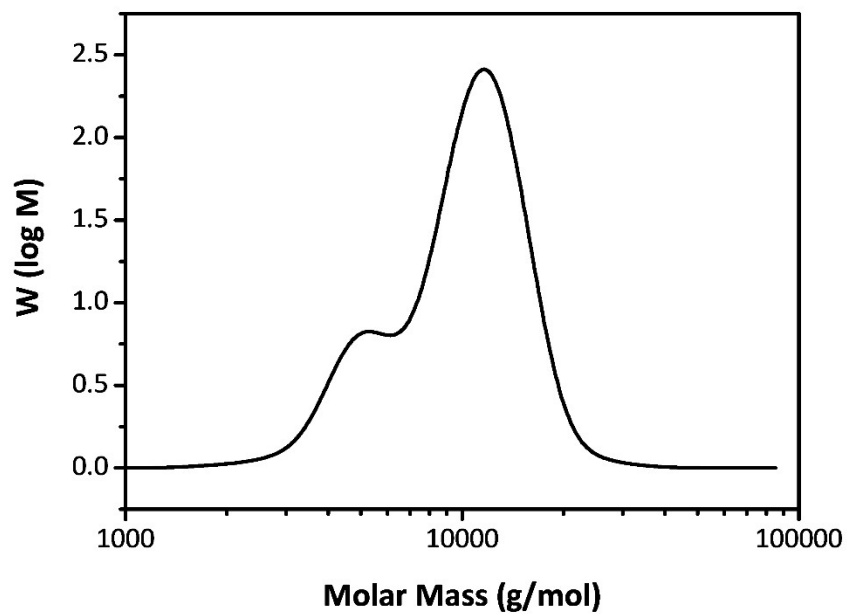

**Figure S1.** Molar mass distribution of Pluronic F127 as measured by gel permeation chromatography.

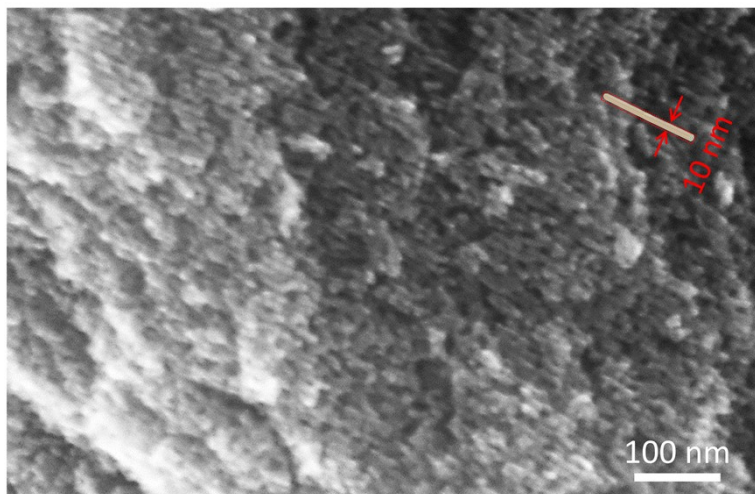

**Figure S2.** SEM image of calcined F127-channel-aligned-1/16DCD-1/20LiClO<sub>4</sub> sample (with an inset of structure diagram).

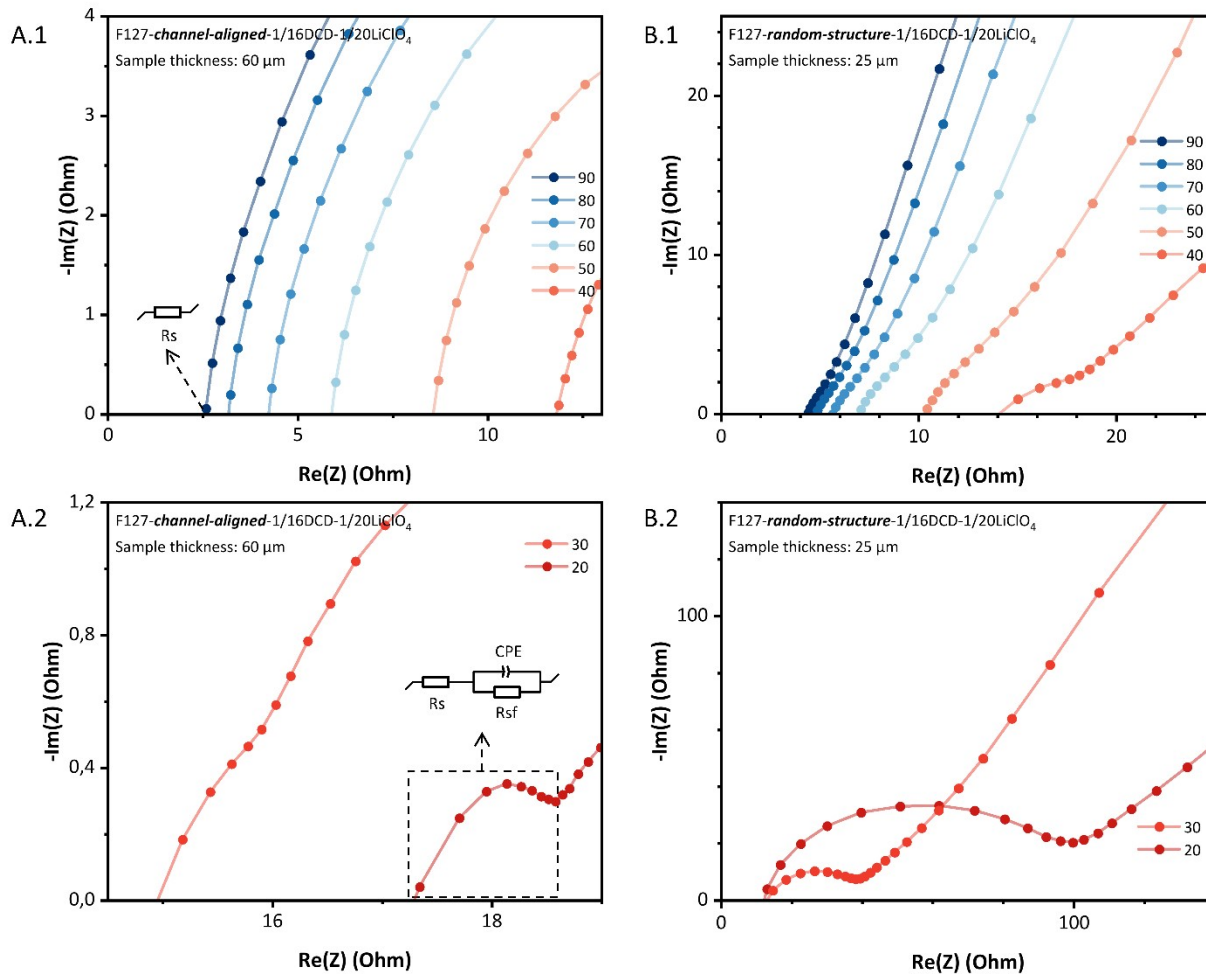

**Figure S3.** Electrochemical impedance spectroscopy (EIS) plots of F127-channel-aligned-1/16DCD-1/20LiClO<sub>4</sub> (A.1 and A.2) and F127-random-structure-1/16DCD-1/20LiClO<sub>4</sub> (B.1 and B.2), assembled in a symmetric stainless-steel (SS) configuration, measured in the temperature range of 90 to 20  $^{\circ}\text{C}$ . The thickness of each sample is indicated in the upper left corner, and the disc-shaped SPE sample has a constant diameter of 1.58 cm.

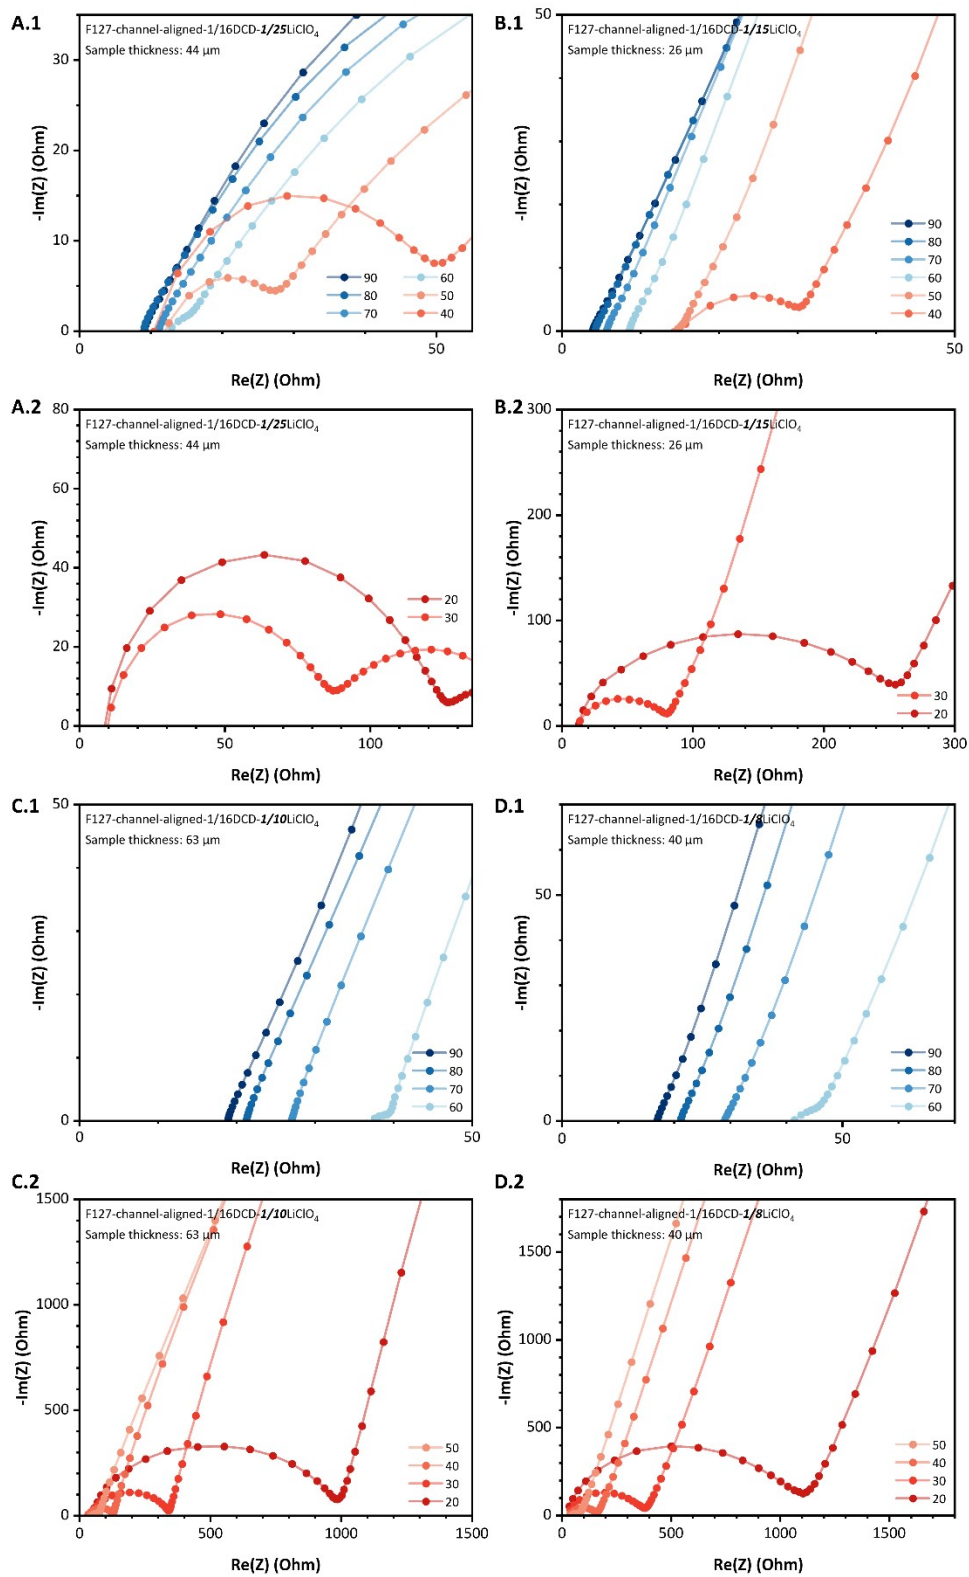

Figure S4. EIS plots of F127-channel-aligned-1/16DCD-1/25LiClO<sub>4</sub> (A.1 and A.2), F127-

channel-aligned-1/16DCD-1/15LiClO<sub>4</sub> (B.1 and B.2), F127-channel-aligned-1/16DCD-1/10LiClO<sub>4</sub> (C.1 and C.2) and F127-channel-aligned-1/16DCD-1/8LiClO<sub>4</sub> (D.1 and D.2), assembled in a symmetric SS configuration, measured in the temperature range of 90 to 20 °C. The thickness of each sample is indicated in the upper left corner, and the disc-shaped SPE sample has a constant diameter of 1.58 cm.

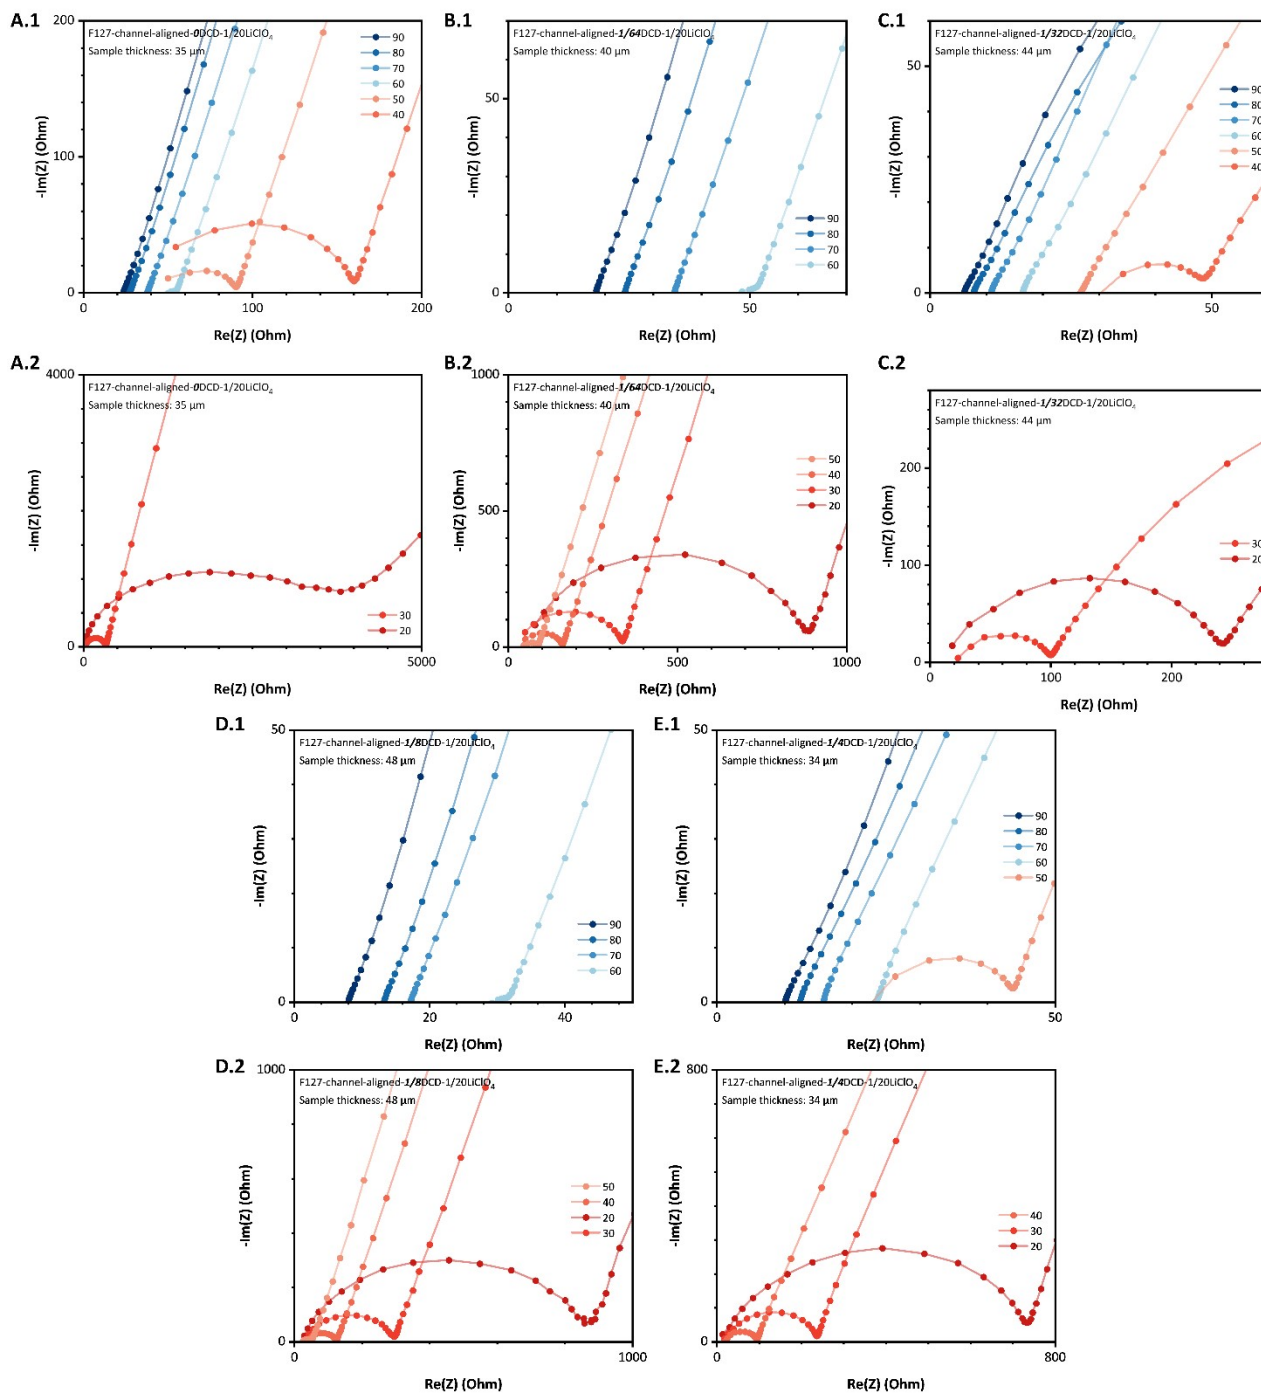

**Figure S5.** EIS plots of F127-channel-aligned-0DCD-1/20LiClO<sub>4</sub> (A.1 and A.2), F127-channel-aligned-1/64DCD-1/20LiClO<sub>4</sub> (B.1 and B.2), F127-channel-aligned-1/32DCD-1/20LiClO<sub>4</sub> (C.1 and C.2), F127-channel-aligned-1/8DCD-1/20LiClO<sub>4</sub> (D.1 and D.2) and F127-channel-aligned-1/4DCD-1/20LiClO<sub>4</sub> (E.1 and E.2), assembled in a symmetric SS configuration, measured in the



temperature range of 90 to 20 °C. The thickness of each sample is indicated in the upper left corner, and the disc-shaped SPE sample has a constant diameter of 1.58 cm.

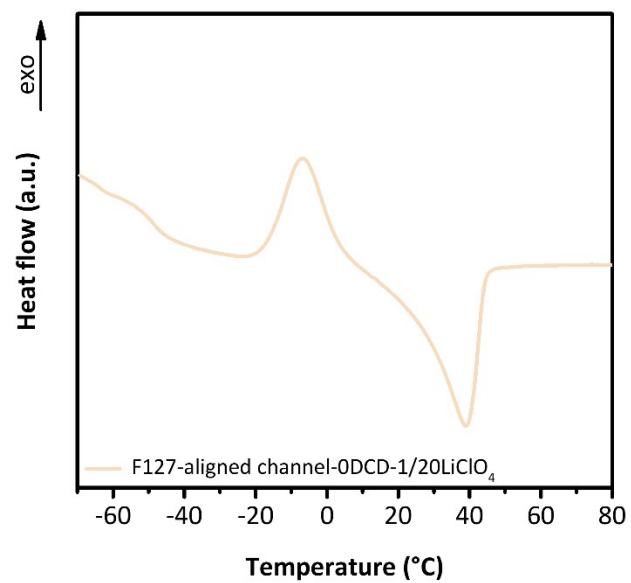

**Figure S6.** DSC curve of F127-aligned channel-0DCD-1/20LiClO<sub>4</sub>.

## 2 Tables

**Tables S1.** Comparison of the ionic conductivity of various solid electrolytes equipped with ionic transfer pathways.

| Ref       | Sample                                                                | Formation of Li <sup>+</sup> pathway                | Ionic conductivity (S/cm) | Temperature (°C) |
|-----------|-----------------------------------------------------------------------|-----------------------------------------------------|---------------------------|------------------|
| This work | F127-aligned channel-1/16DCD-1/20LiClO <sub>4</sub> solid electrolyte | Aligned channels by F127-based micelles             | $1.65 \times 10^{-4}$     | 20               |
| 1         | PEO-MUSiO <sub>2</sub> composite polymer electrolyte                  | ~12 nm SiO <sub>2</sub>                             | $4.4 \times 10^{-5}$      | 30               |
| 2         | Polyimide/PEO/LiTFSI solid polymer electrolyte                        | Nanoporous polyimide film                           | $2.3 \times 10^{-4}$      | 30               |
| 3         | SiO <sub>2</sub> -PEO-LiTFSI electrolyte                              | SiO <sub>2</sub> nanofibre framework                | $1.3 \times 10^{-4}$      | 30               |
| 4         | LLTO-PAN-LiClO <sub>4</sub> electrolyte                               | Aligned LLTO nanowires                              | $6.05 \times 10^{-5}$     | 30               |
| 5         | P-P-A@SiO <sub>2</sub> solid polymer electrolyte                      | Modified nanosilica                                 | $2.6 \times 10^{-4}$      | RT               |
| 6         | Composite solid-state polymer electrolyte based on ceramic nanowires  | Ceramic nanowires                                   | $10^{-3}$ - $10^{-5}$     | RT               |
| 7         | PEO-100ZrO <sub>2</sub> @ ionic liquids                               | Framework of ZrO <sub>2</sub> loading ionic liquids | $4.06 \times 10^{-4}$     | 60               |
| 8         | LLTO nanotubes/PAN composite solid electrolyte                        | LLTO nanotubes                                      | $3.6 \times 10^{-4}$      | RT               |
| 9         | Polyamide/PEO/LiTFSI electrolyte                                      | Porous polyamide film                               | $2.05 \times 10^{-4}$     | 30               |

**Tables S2.** thermodynamic properties characterized by DSC about F127-aligned channel-0DCD-1/20LiClO<sub>4</sub>.

| Samples                                          | T <sub>g</sub> (°C) |                  | T <sub>m</sub> (°C) |
|--------------------------------------------------|---------------------|------------------|---------------------|
|                                                  | T <sub>g,1</sub>    | T <sub>g,2</sub> |                     |
| F127-aligned channel-0DCD-1/20LiClO <sub>4</sub> | -63.5               | -49.0            | 39.0                |

### 3 Supporting References

- 1 D. Lin, W. Liu, Y. Liu, H. R. Lee, P.-C. Hsu, K. Liu and Y. Cui, *Nano Lett.*, 2016, **16**, 459–465.
- 2 J. Wan, J. Xie, X. Kong, Z. Liu, K. Liu, F. Shi, A. Pei, H. Chen, W. Chen, J. Chen, X. Zhang, L. Zong, J. Wang, L.-Q. Chen, J. Qin and Y. Cui, *Nat. Nanotechnol.*, 2019, **14**, 705–711.
- 3 S. Liu, H. Shan, S. Xia, J. Yan, J. Yu and B. Ding, *ACS Appl. Mater. Interfaces*, 2020, **12**, 31439–31447.
- 4 W. Liu, S. W. Lee, D. Lin, F. Shi, S. Wang, A. D. Sendek and Y. Cui, *Nat. Energy*, 2017, **2**, 17035.
- 5 X. Cai, J. Ding, Z. Chi, W. Wang, D. Wang and G. Wang, *ACS Nano*, 2021, **15**, 20489–20503.
- 6 L. Zhang, H. Gao, S. Xiao, J. Li, T. Ma, Q. Wang, W. Liu and S. Wang, *ACS Mater. Lett.*, 2022, **4**, 1297–1305.
- 7 Y. Liang, N. Chen, W. Qu, C. Yang, L. Li, F. Wu and R. Chen, *ACS Appl. Mater. Interfaces*, 2021, **13**, 42957–42965.
- 8 S. Hu, L. Du, G. Zhang, W. Zou, Z. Zhu, L. Xu and L. Mai, *ACS Appl. Mater. Interfaces*, 2021, **13**, 13183–13190.
- 9 Y. Xu, S. Zhang, T. Liang, Z. Yao, X. Wang, C. Gu, X. Xia and J. Tu, *ACS Appl. Mater. Interfaces*, 2021, **13**, 11018–11025.
